# Supplementary material
Source: PubMed Central journal article supplement (PMC6727846)

## Supporting Information

### 4-Aryl pyrrolidines as a novel class of orally efficacious antimalarial agents. Part 1:

#### Evaluation of 4-aryl-*N*-benzylpyrrolidine-3-carboxamides

Marvin J. Meyers,<sup>a,b,\*</sup> Jianguang Liu,<sup>c</sup> Jing Xu,<sup>c</sup> Fang Leng,<sup>c</sup> Jiantong Guan,<sup>c</sup> Zhijun Liu,<sup>c</sup> Sarah A. McNitt,<sup>a,b</sup> Limei Qin,<sup>d</sup> Linglin Dai,<sup>d</sup> Hongwei Ma,<sup>c</sup> Dickson Adah,<sup>d,e</sup> Siting Zhao,<sup>d</sup> Xiaofen Li,<sup>d</sup> Alex J Polino,<sup>f</sup> Armiyaw S. Nasamu,<sup>f</sup> Daniel E. Goldberg,<sup>f</sup> Xiaorong Liu,<sup>c</sup> Yongzhi Lu,<sup>c</sup> Zhengchao Tu,<sup>c</sup> Xiaoping Chen,<sup>d,\*</sup> and Micky D. Tortorella<sup>c,g,\*</sup>

<sup>a</sup> Department of Chemistry, Saint Louis University, Saint Louis, MO, USA

<sup>b</sup> Center for World Health and Medicine, Saint Louis University School of Medicine, Saint Louis, MO, USA

<sup>c</sup> Drug Discovery Pipeline at the Guangzhou Institutes for Biomedicine and Health, Chinese Academy of Sciences, Guangzhou, China

<sup>d</sup> Laboratory of Pathogen Biology, State Key Laboratory of Respiratory Disease, Center of Infection and Immunity, Guangzhou Institutes of Biomedicine and Health, Chinese Academy of Sciences, Guangzhou, China

<sup>e</sup> University of Chinese Academy of Sciences, Beijing, China

<sup>f</sup> Departments of Medicine and Molecular Microbiology, Washington University in St. Louis, Saint Louis, MO, USA

<sup>g</sup> Legion/Lijien Pharmaceuticals, Guangzhou, China

### Table of Contents

|                                                               |     |
|---------------------------------------------------------------|-----|
| Synthesis and Characterization of Compounds                   | S2  |
| <sup>1</sup> H and <sup>13</sup> C NMR Spectra for <b>54b</b> | S18 |
| X-ray crystallographic data for <b>54b</b>                    | S20 |

**General.** Commercially obtained reagents were used without further purification. All reactions were monitored by TLC with silica gel-coated plates. Chemical structures and IUPAC names were generated using CambridgeSoftChemDraw Ultra 10.0 or CDD Vault (www.collaborativedrug.com). Specific rotation values were recorded on AUTOPOL® $\mu$ OJ-H, 4.6mm x 250mm 5 IV-T ( $\lambda$ = 589 nm, 50 mm cell, 20°C). MS analyses were performed on the API 2000 electrospray mass spectrometer in positive/negative ion mode. The scan range was 100–1000d.  $^1\text{H}$  NMR spectra were recorded on a Bruker AV-400 or 500 MHz spectrometer. Chemical shifts ( $\delta$ ) are given in relative to tetramethylsilane ( $\delta$  0.00 ppm) in  $\text{CDCl}_3$ . Coupling constants,  $J$ , were reported in hertz unit (Hz). All compounds were  $\geq 95\%$  pure by HPLC analysis conducted on an Agilent 1260 system using a reverse phase C18 column with diode array detector and a methanol/water (0.1%  $\text{NH}_4\text{OH}$ ) gradient unless stated otherwise. HRMS spectra were recorded on an ABSciex 5600+ instrument.

**Synthesis of Compounds.** Compounds **6**, **12-44**, and **56-62** were prepared according to the general procedures below or analogous to the procedures for **53**.

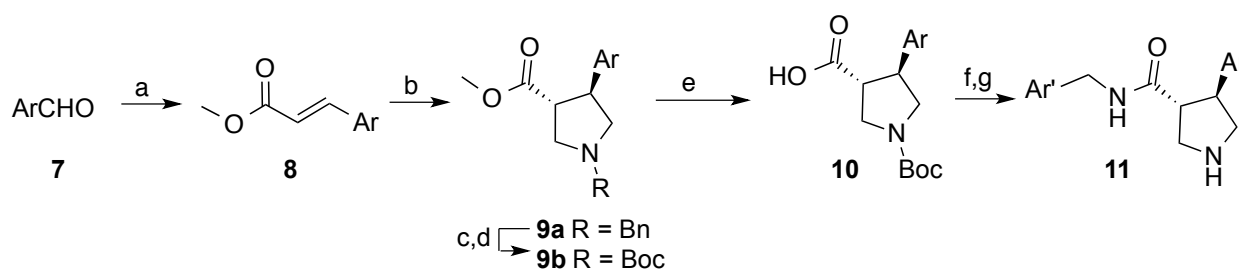

**Scheme S1: Synthesis of Racemates**

**Wittig reaction.** To a stirred solution of methyl (triphenylphosphoranylidene)acetate (1.05 equiv) in dichloromethane (5 mL/g) was added the corresponding aldehyde (1 equiv) at 0 °C, and

then the resulting mixture was stirred at room temperature for 4 h . The reaction was monitored by TLC (10% ethyl acetate in petroleum ether). The reaction was concentrated *in vacuo*. Flash chromatography afforded the  $\alpha,\beta$ -unsaturated esters **8**.

**3+2 Cycloaddition.** To a stirred solution of  $\alpha,\beta$ -unsaturated ester **8** (1 equiv) in dichloromethane (10 mL/g) was added N-(methoxymethyl)-N-(trimethylsilylmethyl)-benzylamine (1.3 equiv). The resulting mixture was cooled to 0 °C and a solution of TFA (0.1 eq) in dichloromethane (2.0 mL) was added dropwise. The reaction mixture was allowed to warm to room temp and stirred for 16 h. The solvent was removed by evaporation *in vacuo* and the resulting oil was purified by flash column chromatography to give the racemic *trans* pyrrolidine isomer **9a**.

**Sequential benzyl deprotection and Boc protection.** To a flask was added **9a** (1 equiv), ammonium formate (3 equiv), 10% Pd/C (~0.1 g/g **9a**) and MeOH (~10 mL/g). The reaction flask was flushed with argon three times and then heated at 70 °C for 30 min. The reaction was cooled to room temp and filtered through Celite®, rinsing with MeOH. To this mixture was added triethylamine (5 equiv), then cooled to 0 °C and di-tert-butyl decarbonate (3 equiv) was added dropwise. The reaction mixture was allowed to warm to room temp and stirred for 16 h. The solvent was removed by evaporation *in vacuo* and the resulting oil was purified by flash column chromatography to give the Boc protected pyrrolidine **9b**.

**Hydrolysis.** To a flask was added **9b** (15.6 g, 44.4 mmol) and methanol (~10 mL/g). A solution of LiOH (2.5 equiv) in water (~20 mL/g LiOH) was added dropwise. The reaction mixture was stirred at room temperature for 4 h. The most of methanol was removed by evaporation, diluted with water and basified with hydrochloric acid (2M) to pH 4. The mixture was extracted with EtOAc (3 times). The combined organic extracts were washed with water then brine, dried over sodium sulfate, filtered and concentrated to afford racemic **10**.

**Amide Coupling and Boc deprotection.** To a suspension of **10** (1 equiv), the appropriate amine (1.2 equiv), HATU (1.5 equiv) in dichloromethane (1 mL/40 mg amine) was added triethylamine (2 equiv). The reaction mixture was stirred at room temp for 16 h. The mixture was diluted with dichloromethane and washed with satd sodium carbonate solution then brine, dried over sodium sulfate, filtered and concentrated. The residue was purified by flash column chromatography to give the Boc-protected carboxamide products.

To a suspension of the Boc-protected carboxamide (1 equiv) in dichloromethane (18 mL/g) was added TFA (9 mL/g). The reaction mixture was stirred at room temp for 2 h. The solvent was removed by evaporation in vacuo and the resulting oil was diluted with dichloromethane and washed with satd sodium carbonate solution then brine, dried over sodium sulfate, filtered and concentrated. The residue was purified by flash column chromatography (DCM/NH<sub>3</sub> in MeOH: 20/1), unless stated otherwise, to give the final products **6**, **12-44**, and **56-62**.

**(±)-(3S,4R)-N-[(4-methoxyphenyl)methyl]-4-[4-(trifluoromethyl)phenyl]pyrrolidine-3-carboxamide trifluoroacetate (**6**).** The crude product was purified by reverse phase HPLC (10-65% acetonitrile/water/0.05% TFA) to give a waxy white solid, 21.5 mg (73% yield). MS:  $m+1 = 379$ . <sup>1</sup>H NMR (400 MHz, DMSO-*d*<sub>6</sub>) δ ppm 9.17 (br. s., 1 H), 8.55 (s, 1 H), 7.74 (d, *J*=8.1 Hz, 2 H), 7.55 (d, *J*=8.0 Hz, 2 H), 6.87 (d, *J*=1.0 Hz, 2 H), 6.75 (d, *J*=1.0 Hz, 2 H), 4.30 (dd, *J*=14.9, 6.7 Hz, 1 H), 3.98 (dd, *J*=15.0, 5.0 Hz, 1 H), 3.69 (s, 3 H), 3.62 - 3.67 (m, 2 H), 3.33 (br. s., 2 H), 3.19 (dd, *J*=8.6 Hz, 2 H).

**(±)-(3S,4R)-N-[(4-methylphenyl)methyl]-4-[4-(trifluoromethyl)phenyl]pyrrolidine-3-carboxamide (**12**).** White solid, 90 mg. <sup>1</sup>H NMR (400 MHz, DMSO-*d*<sub>6</sub>) δ ppm 9.95 (br, 1H), 9.69 (br, 1H), 8.65 (br, 1H), 7.69 (d, *J*= 8.0 Hz, 2H), 7.57 (d, *J*= 7.6 Hz, 2H), 6.97 (d, *J*=7.2 Hz, 2H), 6.81 (d, *J*= 7.6 Hz, 2H), 4.29 (dd, *J*= 14.8, 6.0 Hz, 1H), 3.99 (dd, *J*= 14.8, 4.0 Hz, 1H), 3.84

(m, 3H), 3.27 (m, 3 H), 2.22 (s, 3H). HRMS (ESI)  $m/z$ :  $[M + H]^+$  Calcd for  $C_{20}H_{22}F_3N_2O$  363.1684; found 363.1670.

**(±)-(3S,4R)-N-benzyl-4-[4-(trifluoromethyl)phenyl]pyrrolidine-3-carboxamide**

**trifluoroacetate (13).** The crude product was purified by reverse phase HPLC (10-65% acetonitrile/water/0.05% TFA) to give a white solid, 43.2 mg (49% yield). MS:  $m+1=349$ .  $^1H$  NMR (400 MHz,  $DMSO-d_6$ )  $\delta$  ppm 8.62 (t,  $J=5.8$  Hz, 1 H), 7.75 (d,  $J=1.0$  Hz, 2 H), 7.57 (d,  $J=8.1$  Hz, 2 H), 7.16 - 7.24 (m, 3 H), 6.94 (dd,  $J=6.5, 3.0$  Hz, 2 H), 4.38 (dd,  $J=15.3, 6.8$  Hz, 1 H), 4.06 (dd,  $J=15.2, 5.0$  Hz, 1 H), 3.70 - 3.77 (m, 2 H), 3.63 - 3.69 (m, 2 H), 3.33 (br. t,  $J=7.3, 7.3$  Hz, 2 H), 3.18 - 3.28 (m, 1 H).

**(±)-(3R,4S)-N-{{4-(dimethylamino)phenyl}methyl}-4-[4-**

**(trifluoromethyl)phenyl]pyrrolidine-3-carboxamide (14).** White solid, 60 mg.  $^1H$  NMR (400 MHz,  $DMSO-d_6$ )  $\delta$  ppm 9.96 (br, 1H), 9.67 (br, 1H), 8.75 (br, 1H), 7.74 (d,  $J = 8.0$  Hz, 2H), 7.58 (d,  $J = 8.4$  Hz, 2H), 7.36 (br, 2H), 7.07 (d,  $J=6.8$  Hz, 2H), 4.28 (dd,  $J = 15.2, 6.0$  Hz, 1H), 4.01 (dd,  $J = 14.8, 5.2$  Hz, 1H), 3.65 (2H, overlapped with the peak of  $H_2O$ ), 3.44 (t,  $J = 7.2$  Hz, 1H), 3.35-3.21 (m, 3H), 3.00 (s, 6H).

**(±)-(3S,4R)-N-[(1-methyl-2,3-dihydro-1H-indol-5-yl)methyl]-4-[4-**

**(trifluoromethyl)phenyl]pyrrolidine-3-carboxamide (15).** Yellow solid, 72 mg.  $^1H$  NMR (400 MHz,  $DMSO-d_6$ )  $\delta$  ppm 8.30 (br, 1H), 7.62 (d,  $J = 8.0$  Hz, 2H), 7.45 (d,  $J = 8.4$  Hz, 2H), 6.67 (s, 1H), 6.62 (d,  $J = 8.4$  Hz, 1H), 6.29 (d,  $J = 8.0$  Hz, 1H), 4.27 (dd,  $J = 14.8, 6.0$  Hz, 1H), 4.13 (dd,  $J = 14.8, 5.2$  Hz, 1H), 3.30 (1H, overlapped with the peak of  $H_2O$ ), 3.24 (m, 3H), 3.20 (t,  $J = 8.4$  Hz, 1H), 3.15 (t,  $J = 8.4$  Hz, 2H), 2.92 (t,  $J = 8.4$  Hz, 1H), 2.84-2.65 (m, 2H), 2.61 (s, 3H). HRMS (ESI)  $m/z$ :  $[M + H]^+$  Calcd for  $C_{22}H_{25}F_3N_3O$  404.1949; found 404.1943.

**(±)-(3S,4R)-N-{{4-(diethylamino)phenyl}methyl}-4-[4-(trifluoromethyl)phenyl]pyrrolidine-3-carboxamide (16).** White solid, 120 mg.  $^1H$  NMR (400 MHz,  $DMSO-d_6$ )  $\delta$  ppm 7.54 (d,  $J =$

8.4 Hz, 2H), 7.33 (d,  $J = 8.0$  Hz, 2H), 6.97 (d,  $J = 8.8$  Hz, 2H), 6.58 (d,  $J = 8.8$  Hz, 2H), 5.53 (br, 1H), 4.31(dd,  $J = 14.4, 5.6$  Hz, 1H), 4.31(dd,  $J = 14.4, 5.6$  Hz, 1H), 3.56 (m, 2H), 3.41 (dd,  $J = 11.6, 5.6$  Hz, 1H), 3.32 (q,  $J = 13.6$  Hz, 4H), 3.28 (m, 1H), 2.92 (t,  $J = 12.0$  Hz, 1H), 2.66 (q,  $J = 13.6$  Hz, 1H), 1.14 (t,  $J = 7.2$  Hz, 1H). HRMS (ESI)  $m/z$ :  $[M + H]^+$  Calcd for  $C_{23}H_{29}F_3N_3O$  420.2262; found 420.2244.

**(±)-(3S,4R)-N-{[4-(dimethylamino)phenyl]methyl}-4-(4-methylphenyl)pyrrolidine-3-carboxamide (17).** Yellow solid, 85 mg.  $^1H$  NMR (400 MHz,  $DMSO-d_6$ )  $\delta$  ppm 8.14 (t,  $J = 5.6$  Hz, 1H), 7.10 (dd,  $J = 14.4, 8.0$  Hz, 2H), 6.91(d,  $J = 8.4$  Hz, 2H), 6.60 (d,  $J = 8.4$  Hz, 2H), 4.14 (dd,  $J = 14.8, 6.0$  Hz, 1H), 4.04 (dd,  $J = 14.8, 5.6$  Hz, 1H), 3.37 (t,  $J = 8.4$  Hz, 1H), 3.25 (q,  $J = 16.8$  Hz, 1H), 2.94 (t,  $J = 7.6$  Hz, 1H), 2.84 (s, 6H), 2.82 (q,  $J = 16.0$  Hz, 1H), 2.69 (t,  $J = 10.0$  Hz, 1H), 2.26 (s, 3H). HRMS (ESI)  $m/z$ :  $[M + H]^+$  Calcd for  $C_{21}H_{28}N_3O$  338.2232; found 338.2210.

**(±)-(3S,4R)-4-(4-chlorophenyl)-N-{[4-(dimethylamino)phenyl]methyl}pyrrolidine-3-carboxamide (18).** White solid, 74 mg.  $^1H$  NMR (500 MHz,  $CDCl_3$ )  $\delta$  ppm 7.27 (d,  $J = 8.8$  Hz, 2H), 7.15 (d,  $J = 6.4$  Hz, 2H), 7.02 (d,  $J = 6.8$  Hz, 2H), 6.66 (d,  $J = 6.8$  Hz, 2H), 5.57 (br, 1H), 4.33 (dd,  $J = 11.2, 4.4$  Hz, 1H), 4.25 (dd,  $J = 11.6, 4.4$  Hz, 1H), 3.50 (t,  $J = 8.8$  Hz, 1H), 3.45 (t,  $J = 6.4$  Hz, 1H), 3.41 (t,  $J = 4.8$  Hz, 1H), 3.25 (dd,  $J = 9.2, 6.8$  Hz, 1H), 2.94 (s, 6H), 2.87 (dd,  $J = 8.8, 7.2$  Hz, 1H), 2.64 (t,  $J = 6.4$  Hz, 1H). HRMS (ESI)  $m/z$ :  $[M + H]^+$  Calcd for  $C_{20}H_{25}ClN_3O$  358.1686; found 358.1673.

**(±)-(3S,4R)-4-(4-tert-butylphenyl)-N-{[4-(dimethylamino)phenyl]methyl}pyrrolidine-3-carboxamide (19).** White solid, 95 mg.  $^1H$  NMR (400 MHz,  $DMSO-d_6$ )  $\delta$  ppm 8.16 (t,  $J = 6.0$  Hz, 1H), 7.29 (d,  $J = 8.0$  Hz, 2H), 7.15 (d,  $J = 8.4$  Hz, 2H), 6.91(d,  $J = 8.8$  Hz, 2H), 6.59 (d,  $J = 8.4$  Hz, 2H), 4.17(dd,  $J = 14.8, 6.0$  Hz, 1H), 4.01 (dd,  $J = 14.8, 5.2$  Hz, 1H), 3.30 (1H, overlapped with the peak of  $H_2O$ ), 3.24 (t,  $J = 10.4$  Hz, 1H), 3.15 (t,  $J = 8.4$  Hz, 1H), 2.92 (t,  $J = 8.4$  Hz, 1H), 2.83 (s,

6H), 2.74 (t,  $J = 9.2$  Hz, 1H), 1.26 (s, 9H). HRMS (ESI)  $m/z$ :  $[M + H]^+$  Calcd for  $C_{24}H_{34}N_3O$  380.2702; found 380.2691. HPLC purity 94.8%.

**(±)-(3R,4S)-4-[4-(difluoromethyl)phenyl]-N-{[4-(dimethylamino)phenyl]methyl}pyrrolidine-3-carboxamide (20).** White solid, 112 mg  $^1H$  NMR (400 MHz,  $DMSO-d_6$ )  $\delta$  ppm 8.21 (t,  $J = 5.6$  Hz, 1H), 7.49 (d,  $J = 8.0$  Hz, 2H), 7.39 (d,  $J = 8.0$  Hz, 2H), 6.87 (d,  $J = 8.8$  Hz, 2H), 6.59 (d,  $J = 8.8$  Hz, 2H), 4.17 (dd,  $J = 14.8, 6.4$  Hz, 1H), 4.02 (dd,  $J = 14.8, 5.2$  Hz, 1H), 3.47 (q,  $J = 16.8$  Hz, 1H), 3.32 (dd,  $J = 10.8, 8.0$  Hz, 1H), 3.22 (dd,  $J = 10.2, 8.0$  Hz, 1H), 3.00-2.86 (m, 2H), 2.83 (s, 6H), 2.78 (d,  $J = 10.4$  Hz, 1H). HRMS (ESI)  $m/z$ :  $[M + H]^+$  Calcd for  $C_{21}H_{26}F_2N_3O$  374.2044; found 374.2026.

**(±)-(3R,4S)-4-[4-(1,1-difluoroethyl)phenyl]-N-{[4-(dimethylamino)phenyl]methyl}pyrrolidine-3-carboxamide (21).** White solid, 82 mg. MS:  $m+1=388.5$ .  $^1H$  NMR (500 MHz,  $DMSO-d_6$ )  $\delta$  ppm 8.21 (br, 1H), 7.47 (d,  $J = 7.5$  Hz, 2H), 7.35 (d,  $J = 8.0$  Hz, 2H), 6.87 (d,  $J = 8.0$  Hz, 2H), 6.59 (d,  $J = 8.0$  Hz, 2H), 4.17 (dd,  $J = 14.5, 6.0$  Hz, 1H), 4.01 (dd,  $J = 15.0, 5.0$  Hz, 1H), 3.44 (q,  $J = 17$  Hz, 1H), 3.30 (t,  $J = 9.5$  Hz, 1H), 3.20 (t,  $J = 9.0$  Hz, 1H), 2.95 (t,  $J = 9.0$  Hz, 1H), 2.87 (q,  $J = 17$  Hz, 1H), 2.83 (s, 6H), 2.77 (t,  $J = 10.0$  Hz, 1H), 1.94 (t,  $J = 19.0$  Hz, 3H). HRMS (ESI)  $m/z$ :  $[M + H]^+$  Calcd for  $C_{22}H_{28}F_2N_3O$  388.2200; found 388.2195.

**(±)-(3R,4S)-N-{[4-(dimethylamino)phenyl]methyl}-4-[4-(pentafluoro- $\lambda^6$ -sulfanyl)phenyl]pyrrolidine-3-carboxamide (22).** White solid, 66 mg.  $^1H$  NMR (500 MHz,  $CDCl_3$ )  $\delta$  ppm 8.25 (t,  $J = 6.0$  Hz, 1H), 7.82 (d,  $J = 7.5$  Hz, 2H), 7.48 (d,  $J = 7.5$  Hz, 2H), 6.86 (d,  $J = 7.5$  Hz, 2H), 6.58 (d,  $J = 7.5$  Hz, 2H), 4.22 (m, 1H), 3.96 (m, 1H), 3.48 (t,  $J = 8.5$  Hz, 2H), 3.23 (t,  $J = 8.5$  Hz, 1H), 3.17 (s, 1H), 2.97 (t,  $J = 8.0$  Hz, 1H), 2.89 (t,  $J = 8.5$  Hz, 1H), 2.83 (s, 6H). HRMS (ESI)  $m/z$ :  $[M + H]^+$  Calcd for  $C_{20}H_{25}F_5N_3OS$  450.1638; found 450.1624.

**(±)-(3R,4S)-N-{{4-(dimethylamino)phenyl}methyl}-4-[3-(pentafluoro- $\lambda^6$ -sulfanyl)phenyl]pyrrolidine-3-carboxamide (23).** White solid, 75 mg.  $^1\text{H}$  NMR (400 MHz,  $\text{DMSO-}d_6$ )  $\delta$  ppm 8.25 (t,  $J = 5.6$  Hz, 1H), 7.77 (m, 2H), 7.56 (q,  $J = 15.2$  Hz, 2H), 6.90 (d,  $J = 8.8$  Hz, 2H), 6.60 (d,  $J = 8.8$  Hz, 2H), 4.17 (dd,  $J = 14.8, 6.0$  Hz, 1H), 4.04 (dd,  $J = 14.8, 5.2$  Hz, 1H), 3.53 (q,  $J = 16.0$  Hz, 1H), 3.34 (d,  $J = 10.8$  Hz, 1H), 3.30 (1H, overlapped with the peak of  $\text{H}_2\text{O}$ ), 2.97 – 2.86 (m, 2H), 2.83 (s, 6H), 2.73 (m, 1H). HRMS (ESI)  $m/z$ :  $[\text{M} + \text{H}]^+$  Calcd for  $\text{C}_{20}\text{H}_{25}\text{F}_5\text{N}_3\text{OS}$  450.1638; found 450.1624.

**(±)-(3S,4R)-N-{{4-(dimethylamino)phenyl}methyl}-4-[3-fluoro-4-(trifluoromethyl)phenyl]pyrrolidine-3-carboxamide (24).** White solid, 62 mg.  $^1\text{H}$  NMR (500 MHz,  $\text{DMSO-}d_6$ )  $\delta$  ppm 8.30 (t,  $J = 5.5$  Hz, 1H), 7.65 (t,  $J = 7.5$  Hz, 1H), 7.33 (d,  $J = 12.5$ , 1H), 7.24 (d,  $J = 8.0$  Hz, 1H), 6.77 (d,  $J = 8.5$  Hz, 2H), 6.52 (d,  $J = 9.0$  Hz, 2H), 4.22 (dd,  $J = 15.0, 7.0$  Hz, 1H), 3.90 (1H, overlapped with the peak of  $\text{H}_2\text{O}$ ), 3.43 (q,  $J = 18.0$  Hz, 1H), 3.28 (t,  $J = 9.5$  Hz, 1H), 3.18 (t,  $J = 8.5$  Hz, 1H), 2.94 (m, 1H), 2.77 (s, 6H), 2.77-2.76 (m, 1H). HRMS (ESI)  $m/z$ :  $[\text{M} + \text{H}]^+$  Calcd for  $\text{C}_{21}\text{H}_{24}\text{F}_4\text{N}_3\text{O}$  410.1855; found 410.1854.

**(±)-(3S,4R)-N-{{4-(dimethylamino)phenyl}methyl}-4-[2-fluoro-4-(trifluoromethyl)phenyl]pyrrolidine-3-carboxamide (25).** White solid, 110 mg.  $^1\text{H}$  NMR (500 MHz,  $\text{DMSO-}d_6$ )  $\delta$  ppm 8.54 (br, 1H), 7.77 (t,  $J = 7.5$  Hz, 1H), 7.72 (d,  $J = 10.5$  Hz, 1H), 6.77 (d,  $J = 8.0$  Hz, 2H), 6.54 (d,  $J = 8.5$  Hz, 2H), 4.25 (dd,  $J = 15.0, 7.0$  Hz, 1H), 3.89 (m, 2H), 3.68 (t,  $J = 11.0$  Hz, 1H), 3.62 (m, 1H), 3.30 (3H, overlapped with the peak of  $\text{H}_2\text{O}$ ), 2.82 (s, 6H). HRMS (ESI)  $m/z$ :  $[\text{M} + \text{H}]^+$  Calcd for  $\text{C}_{21}\text{H}_{24}\text{F}_4\text{N}_3\text{O}$  410.1855; found 410.1838.

**(±)-(3S,4R)-4-[3-chloro-4-(trifluoromethyl)phenyl]-N-{{4-(dimethylamino)phenyl}methyl}pyrrolidine-3-carboxamide (26).** White solid, 78 mg.  $^1\text{H}$  NMR (400 MHz,  $\text{DMSO-}d_6$ )  $\delta$  ppm 8.25 (br, 1H), 7.76 (d,  $J = 8.0$  Hz, 1H), 7.62 (s, 1H), 7.42 (d,  $J = 7.6$  Hz, 1H), 6.87 (d,  $J = 8.0$  Hz, 2H), 6.58 (d,  $J = 8.0$  Hz, 2H), 4.22 (dd,  $J = 14.4, 6.0$  Hz,



1H), 3.98 (dd,  $J = 14.4, 4.0$  Hz, 1H), 3.45 (2H, overlapped with the peak of H<sub>2</sub>O), 3.23 (t,  $J = 8.0$  Hz, 1H), 2.95-2.83 (m, 2H), 2.83 (s, 6H). HRMS (ESI)  $m/z$ :  $[M + H]^+$  Calcd for C<sub>21</sub>H<sub>24</sub>ClF<sub>3</sub>N<sub>3</sub>O 426.156; found 426.1544.

**(±)-(3S,4R)-4-[2-chloro-4-(trifluoromethyl)phenyl]-N-{{4-(dimethylamino)phenyl}methyl}pyrrolidine-3-carboxamide (27).** Brown solid, 85 mg. <sup>1</sup>H NMR (400 MHz, DMSO-*d*<sub>6</sub>)  $\delta$  ppm 9.97 (br, 1H), 9.66 (br, 1H), 8.62 (br, 1H), 7.93 (d,  $J = 7.6$  Hz, 1H), 7.90 (s, 1H), 7.76 (d,  $J = 7.6$  Hz, 1H), 6.84 (d,  $J = 6.8$  Hz, 2H), 6.68 (br, 2H), 4.22 (dd,  $J = 14.4, 5.6$  Hz, 1H), 4.13 (q,  $J = 16.8$  Hz, 1H), 4.00 (dd,  $J = 14.4, 5.6$  Hz, 1H), 3.72-3.63 (m, 3H), 3.29-3.10 (m, 2H), 2.85 (s, 6H). HRMS (ESI)  $m/z$ :  $[M + H]^+$  Calcd for C<sub>21</sub>H<sub>24</sub>ClF<sub>3</sub>N<sub>3</sub>O 426.156; found 426.1565.

**(±)-(3S,4R)-4-(3,4-dichlorophenyl)-N-{{4-(dimethylamino)phenyl}methyl}pyrrolidine-3-carboxamide (28).** White solid, 56 mg. <sup>1</sup>H NMR (400 MHz, DMSO-*d*<sub>6</sub>)  $\delta$  ppm 8.21 (br, 1H), 7.53 (d,  $J = 8.0$  Hz, 1H), 7.51 (s, 1H), 7.24 (d,  $J = 8.0$  Hz, 1H), 6.88 (d,  $J = 8.4$  Hz, 2H), 6.60 (d,  $J = 8.0$  Hz, 2H), 4.20 (dd,  $J = 14.8, 5.6$  Hz, 1H), 4.00 (dd,  $J = 14.8, 5.2$  Hz, 1H), 3.45 (1H, overlapped with the peak of H<sub>2</sub>O), 3.28 (q,  $J = 16.8$  Hz, 1H), 3.18 (t,  $J = 8.8$  Hz, 1H), 2.91 (t,  $J = 8.0$  Hz, 1H), 2.84 (s, 6H), 2.76 (t,  $J = 9.6$  Hz, 1H). HRMS (ESI)  $m/z$ :  $[M + H]^+$  Calcd for C<sub>20</sub>H<sub>24</sub>Cl<sub>2</sub>N<sub>3</sub>O 392.1296; found 392.1278.

**(±)-(3S,4R)-4-(3-chloro-4-methylphenyl)-N-{{4-(dimethylamino)phenyl}methyl}pyrrolidine-3-carboxamide (29).** White solid, 130 mg. <sup>1</sup>H NMR (400 MHz, DMSO-*d*<sub>6</sub>)  $\delta$  ppm 9.47 (br, 1H), 8.51 (t,  $J = 5.6$  Hz, 1H), 7.41 (s, 1H), 7.33 (d,  $J = 8.0$  Hz, 1H), 7.20 (d,  $J = 6.8$  Hz, 1H), 6.80 (d,  $J = 8.8$  Hz, 2H), 6.56 (d,  $J = 8.4$  Hz, 2H), 4.23 (dd,  $J = 14.8, 6.4$  Hz, 1H), 3.95 (dd,  $J = 14.8, 6.4$  Hz, 1H), 3.58 (m, 3H), 3.25 (m, 3H), 2.84 (s, 6H), 2.32 (s, 3H). HRMS (ESI)  $m/z$ :  $[M + H]^+$  Calcd for C<sub>21</sub>H<sub>27</sub>ClN<sub>3</sub>O 372.1842; found 372.1842.

**(±)-(3S,4R)-N-{[4-(dimethylamino)phenyl]methyl}-4-(4-phenoxyphenyl)pyrrolidine-3-carboxamide (30).** White solid, 87 mg. <sup>1</sup>H NMR (500 MHz, DMSO-*d*<sub>6</sub>) δ ppm 8.43 (t, *J* = 5.5 Hz, 1H), 7.35 (t, *J* = 8.0 Hz, 2H), 7.27 (d, *J* = 10.5 Hz, 2H), 7.13 (t, *J* = 7.0 Hz, 1H), 6.93 (d, *J* = 8.0 Hz, 4H), 6.74 (d, *J* = 8.0 Hz, 2H), 6.51 (d, *J* = 10.5 Hz, 2H), 4.28 (dd, *J* = 15.0, 7.0 Hz, 1H), 3.90 (1H, overlapped with the peak of H<sub>2</sub>O), 3.60 (m, 2H), 3.52 (q, *J* = 22.0 Hz, 1H), 3.30 (t, *J* = 10.5 Hz, 1H), 3.20 (t, *J* = 11.0 Hz, 1H), 3.12 (q, *J* = 19.0 Hz, 1H), 2.74 (s, 6H). HRMS (ESI) *m/z*: [M + H]<sup>+</sup> Calcd for C<sub>26</sub>H<sub>30</sub>N<sub>3</sub>O<sub>2</sub> 416.2338; found 416.2334.

**(±)-(3S,4R)-N-{[4-(dimethylamino)phenyl]methyl}-4-(3-phenoxyphenyl)pyrrolidine-3-carboxamide (31).** White solid, 102 mg. <sup>1</sup>H NMR (400 MHz, DMSO-*d*<sub>6</sub>) δ ppm 8.47 (t, *J* = 5.2 Hz, 1H), 7.39-7.33 (m, 3H), 7.14 (t, *J* = 7.2 Hz, 1H), 7.09 (d, *J* = 7.6 Hz, 1H), 7.04 (s, 1H), 6.98 (d, *J* = 8.0 Hz, 2H), 6.88 (m, 3H), 6.58 (d, *J* = 8.4 Hz, 2H), 4.19 (dd, *J* = 14.8, 6.4 Hz, 1H), 4.01 (dd, *J* = 14.8, 4.8 Hz, 1H), 3.62-3.53 (m, 2H), 3.49 (t, *J* = 8.0 Hz, 1H), 3.19-3.10 (m, 3H), 2.82 (s, 6H). HRMS (ESI) *m/z*: [M + H]<sup>+</sup> Calcd for C<sub>26</sub>H<sub>30</sub>N<sub>3</sub>O<sub>2</sub> 416.2338; found 416.2329.

**(±)-(3S,4R)-N-{[4-(dimethylamino)phenyl]methyl}-4-[4-(pyridin-2-yloxy)phenyl]pyrrolidine-3-carboxamide (32).** White solid, 78 mg. <sup>1</sup>H NMR (400 MHz, DMSO-*d*<sub>6</sub>) δ ppm 8.23 (t, *J* = 5.2 Hz, 1H), 8.13 (dd, *J* = 4.8, 1.6 Hz, 1H), 7.83 (t, *J* = 8.8 Hz, 1H), 7.26 (d, *J* = 8.4 Hz, 2H), 7.11 (dd, *J* = 7.2, 4.8 Hz, 1H), 7.03 (d, *J* = 8.4 Hz, 2H), 6.98 (d, *J* = 8.4 Hz, 1H), 6.94 (d, *J* = 8.4 Hz, 2H), 6.62 (d, *J* = 8.8 Hz, 2H), 4.15 (dd, *J* = 14.8, 4.8 Hz, 1H), 4.07 (dd, *J* = 14.8, 4.8 Hz, 1H), 3.42 (q, *J* = 16.8, 1H), 3.29 (t, *J* = 8.0 Hz, 1H), 3.17 (td, *J* = 10.0, 2.0 Hz, 1H), 2.89 (m, 2H), 2.82 (s, 6H), 2.74 (td, *J* = 10.4, 1.2 Hz, 1H). HRMS (ESI) *m/z*: [M + H]<sup>+</sup> Calcd for C<sub>25</sub>H<sub>29</sub>N<sub>4</sub>O<sub>2</sub> 417.229; found 417.2275.

**(±)-(3S,4S)-N-{[4-(dimethylamino)phenyl]methyl}-4-{2-[4-(trifluoromethyl)phenyl]ethyl}pyrrolidine-3-carboxamide (33).** White solid, 96 mg. <sup>1</sup>H NMR (400 MHz, DMSO-*d*<sub>6</sub>) δ ppm 8.26 (br, 1H), 7.59 (d, *J* = 7.6 Hz, 2H), 7.36 (d, *J* = 8.0 Hz, 2H),

7.05 (d,  $J = 8.4$  Hz, 2H), 6.65 (d,  $J = 8.4$  Hz, 2H), 4.21(dd,  $J = 14.8, 5.6$  Hz, 1H), 4.07 (dd,  $J = 14.4, 5.2$  Hz, 1H), 3.03-2.94 (m, 2H), 2.84 (s, 6H), 2.77 (m, 1H), 2.63 (t,  $J = 7.6$  Hz, 2H), 2.39 (q,  $J = 14.2$  Hz, 2H), 2.11(q,  $J = 14.4$ , 1H), 1.74-1.68 (m, 1H), 1.67-1.59 (m, 1H). HRMS (ESI)  $m/z$ :  $[M + H]^+$  Calcd for  $C_{23}H_{29}F_3N_3O$  420.2262; found 420.2259.

**(±)-N-{{4-(dimethylamino)phenyl}methyl}-4-[6-(trifluoromethyl)pyridin-3-yl]pyrrolidine-3-carboxamide (34).** White solid, 130 mg.  $^1H$  NMR (500 MHz,  $CDCl_3$ )  $\delta$  ppm 8.60 (d,  $J = 2.0$  Hz, 1H), 7.71 (dd,  $J = 8.0, 2.0$  Hz, 1H), 7.60 (d,  $J = 8.0$  Hz, 1H), 7.04 (d,  $J = 8.5$  Hz, 2H), 6.65 (d,  $J = 8.5$  Hz, 2H), 5.70 (br, 1H), 4.29 (m, 2H), 3.64 (q,  $J = 16.0$  Hz, 1H), 3.58 (t,  $J = 11.0$  Hz, 1H), 3.38 (dd,  $J = 11.5, 5.5$  Hz, 1H), 3.30 (t,  $J = 11.5$  Hz, 1H), 2.90 (m, 7H), 2.68 (q,  $J = 15.0$  Hz, 1H). HRMS (ESI)  $m/z$ :  $[M + H]^+$  Calcd for  $C_{20}H_{24}F_3N_4O$  393.1902; found 393.1913.

**(±)-N-{{4-(dimethylamino)phenyl}methyl}-4-[2-(trifluoromethyl)pyrimidin-5-yl]pyrrolidine-3-carboxamide (35).** White solid, 78 mg.  $^1H$  NMR (400 MHz,  $DMSO-d_6$ )  $\delta$  ppm 8.98 (s, 2H), 8.22 (t,  $J = 5.2$  Hz, 1H), 6.90 (d,  $J = 8.4$  Hz, 2H), 6.60 (d,  $J = 8.4$  Hz, 2H), 4.16 (dd,  $J = 14.8, 6.0$  Hz, 1H), 4.03 (dd,  $J = 14.8, 5.2$  Hz, 1H), 3.46 (q,  $J = 16.0$  Hz, 1H), 3.39-3.25 (m, 2H), 3.30-2.87 (m, 3H), 2.83 (s, 6H). HRMS (ESI)  $m/z$ :  $[M + H]^+$  Calcd for  $C_{19}H_{23}F_3N_5O$  394.1854; found 394.1838.

**(±)-(3R,4S)-4-(1-benzothiophen-5-yl)-N-{{4-(dimethylamino)phenyl}methyl}pyrrolidine-3-carboxamide (36).** White solid, 120 mg.  $^1H$  NMR (400 MHz,  $CDCl_3$ )  $\delta$  ppm 7.75 (d,  $J = 7.6$  Hz, 1H), 6.65 (d,  $J = 7.6$  Hz, 1H), 7.37-7.25 (m, 2H), 7.07 (s, 1H), 7.02 (d,  $J = 8.8$  Hz, 2H), 6.58 (d,  $J = 8.4$  Hz, 2H), 5.74 (br, 1H), 4.35 (dd,  $J = 14.4, 5.6$  Hz, 1H), 4.27 (dd,  $J = 14.4, 5.2$  Hz, 1H), 3.82 (q,  $J = 16.0$  Hz, 1H), 3.57 (dd,  $J = 11.6, 7.6$  Hz, 1H), 3.40 (dd,  $J = 11.6, 5.2$  Hz, 1H), 3.27 (dd,  $J = 11.6, 8.0$  Hz, 1H), 3.01 (dd,  $J = 11.6, 8.8$  Hz, 1H), 2.90 (s, 6H), 2.85-2.76 (m, 1H). HRMS (ESI)  $m/z$ :  $[M + H]^+$  Calcd for  $C_{22}H_{26}N_3OS$  380.1796; found 380.1774.

**(±)-(3R,4S)-4-(1-benzothiophen-6-yl)-N-{[4-(dimethylamino)phenyl]methyl}pyrrolidine-3-carboxamide (37).** White solid, 110 mg. <sup>1</sup>H NMR (400 MHz, CDCl<sub>3</sub>) δ ppm 7.75 (d, *J* = 8.0 Hz, 1H), 6.65 (d, *J* = 7.6 Hz, 1H), 7.34-7.25 (m, 2H), 7.06 (s, 1H), 7.02 (d, *J* = 8.0 Hz, 2H), 6.58 (d, *J* = 8.4 Hz, 2H), 5.80 (br, 1H), 4.35(dd, *J* = 14.4, 5.6 Hz, 1H), 4.27 (dd, *J* = 14.4, 5.2 Hz, 1H), 3.83 (q, *J* = 16.0 Hz, 1H), 3.57 (dd, *J* = 11.6, 7.6 Hz, 1H), 3.39 (dd, *J* = 11.6, 5.6 Hz, 1H), 3.26 (dd, *J* = 11.6, 8.4 Hz, 1H), 3.00 (dd, *J* = 11.2, 8.8 Hz, 1H), 2.90 (s, 6H), 2.81-2.73 (m, 1H). HRMS (ESI) *m/z*: [M + H]<sup>+</sup> Calcd for C<sub>22</sub>H<sub>26</sub>N<sub>3</sub>OS 380.1796; found 380.1783.

**(±)-(3R,4R)-4-(1-benzofuran-2-yl)-N-{[4-(dimethylamino)phenyl]methyl}pyrrolidine-3-carboxamide (38).** White solid, 79 mg. MS: *m*+1=364.3. <sup>1</sup>H NMR (400 MHz, CDCl<sub>3</sub>) δ ppm 7.47 (d, *J* = 8.4 Hz, 1H), 7.36 (d, *J* = 8.0 Hz, 1H), 7.24-7.08 (m, 2H), 7.07 (d, *J* = 8.4 Hz, 2H), 6.62 (d, *J* = 8.4 Hz, 2H), 6.48 (s, 1H), 6.08 (br, 1H), 4.33 (dd, *J* = 14.4, 5.6 Hz, 1H), 4.27 (dd, *J* = 14.4, 5.2 Hz, 1H), 3.76 (q, *J* = 15.2 Hz, 1H), 3.55 (dd, *J* = 11.2, 8.0 Hz, 1H), 3.44-3.23 (m, 2H), 3.19 (dd, *J* = 11.2, 8.4 Hz, 1H), 3.00 (q, *J* = 13.6, 1H), 2.90 (s, 6H). HRMS (ESI) *m/z*: [M + H]<sup>+</sup> Calcd for C<sub>22</sub>H<sub>26</sub>N<sub>3</sub>O<sub>2</sub> 364.2025; found 364.2021.

**(±)-(3R,4R)-4-(1-benzothiophen-2-yl)-N-{[4-(dimethylamino)phenyl]methyl}pyrrolidine-3-carboxamide (39).** White solid, 130 mg. MS: *m*+1=380.1. <sup>1</sup>H NMR (400 MHz, CDCl<sub>3</sub>) δ ppm 7.75 (d, *J* = 7.6 Hz, 1H), 7.66 (d, *J* = 7.6 Hz, 1H), 7.34-7.25 (m, 2H), 7.06 (s, 1H), 7.02 (d, *J* = 8.4 Hz, 2H), 6.58 (d, *J* = 8.8 Hz, 2H), 5.75 (br, 1H), 4.35 (dd, *J* = 14.4, 5.6 Hz, 1H), 4.27 (dd, *J* = 14.4, 5.6 Hz, 1H), 3.84 (q, *J* = 16.0 Hz, 1H), 3.58 (dd, *J* = 11.6, 8.0 Hz, 1H), 3.40 (dd, *J* = 11.6, 6.0 Hz, 1H), 3.27 (dd, *J* = 11.6, 8.0 Hz, 1H), 3.01 (dd, *J* = 11.2, 10.0 Hz, 1H), 2.90 (s, 6H), 3.00 (q, *J* = 15.2 Hz, 1H). HRMS (ESI) *m/z*: [M + H]<sup>+</sup> Calcd for C<sub>22</sub>H<sub>26</sub>N<sub>3</sub>OS 380.1796; found 380.1795.

**(±)-(3S,4R)-N-{[4-(dimethylamino)phenyl]methyl}-4-(quinolin-3-yl)pyrrolidine-3-carboxamide (40).** White solid, 96mg. <sup>1</sup>H NMR (400 MHz, DMSO-*d*<sub>6</sub>) δ ppm 8.84 (d, *J* = 2.0 Hz, 1H), 8.23 (t, *J* = 5.6 Hz, 1H), 8.18 (s, 1H), 8.00 (d, *J* = 8.4 Hz, 1H), 7.91 (d, *J* = 8.0 Hz, 1H),

7.71 (t,  $J = 7.6$  Hz, 1H), 7.59 (t,  $J = 7.2$  Hz, 1H), 6.80 (d,  $J = 8.4$  Hz, 2H), 6.43 (d,  $J = 8.4$  Hz, 2H), 4.20 (dd,  $J = 14.8, 6.4$  Hz, 1H), 3.98 (dd,  $J = 14.8, 5.2$  Hz, 1H), 3.60 (q,  $J = 16.0$ , 1H), 3.44 (m, 1H), 3.30 (2H, overlapped with the peak of H<sub>2</sub>O), 3.02 (t,  $J = 5.6$  Hz, 1H), 2.99 -2.90 (m, 2H), 2.78 (s, 6H). HRMS (ESI)  $m/z$ : [M + H]<sup>+</sup> Calcd for C<sub>23</sub>H<sub>27</sub>N<sub>4</sub>O 375.2185; found 375.2180.

**(±)-(3R,4R)-4-(5-tert-butylthiophen-2-yl)-N-{[4-(dimethylamino)phenyl]methyl}pyrrolidine-3-carboxamide (41).** White solid, 86 mg. <sup>1</sup>H NMR (400 MHz, CDCl<sub>3</sub>)  $\delta$  ppm 7.08 (d,  $J = 8.4$  Hz, 2H), 6.66 (d,  $J = 8.4$  Hz, 2H), 6.60 (q,  $J = 7.2$  Hz, 2H), 5.74 (br, 1H), 4.34 (dd,  $J = 14.4, 5.2$  Hz, 1H), 4.28 (dd,  $J = 14.4, 5.6$  Hz, 1H), 3.65 (q,  $J = 14.2$  Hz, 1H), 3.50 (dd,  $J = 11.6, 7.6$  Hz, 1H), 3.36 (dd,  $J = 11.6, 5.2$  Hz, 1H), 3.20 (dd,  $J = 11.6, 8.4$  Hz, 1H), 2.92 (s, 6H), 2.89 (dd,  $J = 11.6, 8.8$  Hz, 1H), 2.67 (q,  $J = 15.2$  Hz, 1H), 1.34 (s, 9H). HRMS (ESI)  $m/z$ : [M + H]<sup>+</sup> Calcd for C<sub>22</sub>H<sub>32</sub>N<sub>3</sub>OS 386.2266; found 386.2251.

**(±)-(3R,4R)-N-{[4-(dimethylamino)phenyl]methyl}-4-[5-(trifluoromethyl)thiophen-2-yl]pyrrolidine-3-carboxamide (42).** Brown solid, 92 mg. MS:  $m+1=398.0$ . <sup>1</sup>H NMR (400 MHz, DMSO-*d*<sub>6</sub>)  $\delta$ ppm 9.24 (br, 2H), 8.23 (t,  $J = 5.2$  Hz, 1H), 7.64 (d,  $J = 2.4$  Hz, 1H), 7.18 (d,  $J = 2.4$  Hz, 1H), 6.94 (d,  $J = 8.4$  Hz, 2H), 6.64 (d,  $J = 8.0$  Hz, 2H), 4.29 (dd,  $J = 14.8, 6.4$  Hz, 1H), 4.03 (d,  $J = 14.4, 4.4$  Hz, 1H), 3.96 (q,  $J = 19.2$  Hz, 1H), 3.78 (1H, overlapped with the peak of H<sub>2</sub>O), 3.39-3.30 (m, 2H), 3.17 (q,  $J = 17.6$  Hz, 1H), 2.85 (s, 6H). HRMS (ESI)  $m/z$ : [M + H]<sup>+</sup> Calcd for C<sub>19</sub>H<sub>23</sub>F<sub>3</sub>N<sub>3</sub>OS 398.1514; found 398.1514.

**(±)-(3R,4R)-N-{[4-(dimethylamino)phenyl]methyl}-4-[2-(trifluoromethyl)-1,3-thiazol-5-yl]pyrrolidine-3-carboxamide (43).** White solid, 56 mg. <sup>1</sup>H NMR (400 MHz, DMSO-*d*<sub>6</sub>)  $\delta$  ppm 8.40 (t,  $J = 5.6$  Hz, 1H), 7.97 (s, 1H), 6.98 (d,  $J = 8.6$  Hz, 2H), 6.63 (d,  $J = 8.6$  Hz, 2H), 4.21 (dd,  $J = 14.6, 6.0$  Hz, 1H), 4.08 (dd,  $J = 14.6, 5.4$  Hz, 1H), 3.84 (q,  $J = 15.6$  Hz, 1H), 3.42 (dd,  $J = 10.8, 7.6$  Hz, 1H), 3.28 (dd,  $J = 10.4, 8.4$  Hz, 1H), 3.03 -2.95 (m, 1H), 2.91 (dd,  $J = 16.2, 7.8$  Hz, 2H), 2.84 (s, 6H). HRMS (ESI)  $m/z$ : [M + H]<sup>+</sup> Calcd for C<sub>18</sub>H<sub>22</sub>F<sub>3</sub>N<sub>4</sub>OS 399.1466; found 399.1461.

**(±)-(3R,4R)-N-{[4-(dimethylamino)phenyl]methyl}-4-[1-methyl-5-(trifluoromethyl)-1H-pyrazol-3-yl]pyrrolidine-3-carboxamide (44).** White solid, 140 mg. MS:  $m+1=396.1$ .  $^1\text{H}$  NMR (400 MHz,  $\text{CDCl}_3$ )  $\delta$  ppm 7.07 (d,  $J = 8.8$  Hz, 2H), 6.67 (d,  $J = 8.4$  Hz, 2H), 6.30 (s, 1H), 5.92 (br, 1H), 4.30 (m, 2H), 3.81 (s, 3H), 3.68 (q,  $J = 15.2$  Hz, 1H), 3.53 (dd,  $J = 11.2, 7.6$  Hz, 1H), 3.26 (d,  $J = 6.4$  Hz, 2H), 2.93 (s, 6H), 2.86 (dd,  $J = 11.6, 8.4$  Hz, 1H), 2.63 (q,  $J = 13.6$  Hz, 1H). HRMS (ESI)  $m/z$ :  $[\text{M} + \text{H}]^+$  Calcd for  $\text{C}_{19}\text{H}_{25}\text{F}_3\text{N}_5\text{O}$  396.2011; found 396.2005.

**(+)-(3R,4S)-N-{[6-(dimethylamino)pyridin-3-yl]methyl}-4-[6-(trifluoromethyl)pyridin-3-yl]pyrrolidine-3-carboxamide (56).** White solid, 130 mg. MS:  $m+1=394.1$ .  $^1\text{H}$  NMR (400 MHz,  $\text{CDCl}_3$ )  $\delta$  ppm 8.60 (d,  $J = 1.6$  Hz, 1H), 8.00 (d,  $J = 2.4$  Hz, 1H), 7.72 (dd,  $J = 8.0, 1.6$  Hz, 1H), 7.60 (d,  $J = 8.0$  Hz, 1H), 7.29 (dd,  $J = 8.4, 2.4$  Hz, 1H), 6.45 (d,  $J = 8.8$  Hz, 1H), 5.72 (br, 1H), 4.26 (d,  $J = 5.6$  Hz, 2H), 3.66-3.57 (m, 2H), 3.39-3.28 (m, 2H), 3.06 (s, 6H), 2.95-2.89 (m, 1H), 2.69 (q,  $J = 13.6$  Hz, 1H).  $[\alpha]_{\text{D}}^{20} +98.7$  ( $c$  0.16, MeOH). HRMS (ESI)  $m/z$ :  $[\text{M} + \text{H}]^+$  Calcd for  $\text{C}_{19}\text{H}_{23}\text{F}_3\text{N}_5\text{O}$  394.1854; found 394.185.

**(±)-(3S,4R)-N-{[4-(pyrrolidin-1-yl)phenyl]methyl}-4-[6-(trifluoromethyl)pyridin-3-yl]pyrrolidine-3-carboxamide (57).** Brown solid, 105 mg.  $^1\text{H}$  NMR (400 MHz,  $\text{DMSO}-d_6$ )  $\delta$  ppm 8.74 (s, 1H), 8.46 (t,  $J = 5.6$  Hz, 1H), 8.05 (d,  $J = 8.4$  Hz, 1H), 7.89 (d,  $J = 8.0$  Hz, 1H), 6.76 (d,  $J = 8.4$  Hz, 2H), 6.36 (d,  $J = 8.4$  Hz, 2H), 4.21 (dd,  $J = 14.8, 6.8$  Hz, 1H), 3.94 (dd,  $J = 14.8, 5.2$  Hz, 1H), 3.67 (m, 2H), 3.58 (t,  $J = 10.0$  Hz, 1H), 3.30 (m, 3H), 3.15 (t,  $J = 6.4$  Hz, 4H), 1.92 (m, 4H). HRMS (ESI)  $m/z$ :  $[\text{M} + \text{H}]^+$  Calcd for  $\text{C}_{22}\text{H}_{26}\text{F}_3\text{N}_4\text{O}$  419.2058; found 419.2056.

**(+)-(3R,4S)-N-{[4-(1H-pyrazol-1-yl)phenyl]methyl}-4-[6-(trifluoromethyl)pyridin-3-yl]pyrrolidine-3-carboxamide (58).** White solid, 56 mg.  $^1\text{H}$  NMR (400 MHz,  $\text{DMSO}-d_6$ )  $\delta$  ppm 8.69 (s, 1H), 8.45 (t,  $J = 6.0$  Hz, 1H), 8.43 (s, 1H), 8.00 (d,  $J = 8.0$  Hz, 1H), 7.85 (d,  $J = 8.0$  Hz, 1H), 7.72 (t,  $J = 6.0$  Hz, 3H), 7.21 (d,  $J = 8.8$  Hz, 2H), 6.53 (t,  $J = 2.4$  Hz, 1H), 4.33 (dd,  $J = 15.2, 2.0$  Hz, 1H), 4.20 (dd,  $J = 15.2, 2.4$  Hz, 1H), 3.55 (q,  $J = 16.0$  Hz, 1H), 3.30 (2H, overlapped

with the peak of H<sub>2</sub>O), 2.98 (m, 2H), 2.87 (t, *J* = 8.4 Hz, 1H). [ $\alpha$ ]D<sup>20</sup> +100.0 (*c* 0.19, MeOH). HRMS (ESI) *m/z*: [M + H]<sup>+</sup> Calcd for C<sub>21</sub>H<sub>21</sub>F<sub>3</sub>N<sub>5</sub>O 416.1698; found 416.1678.

**(+)-(3R,4S)-4-[6-(trifluoromethyl)pyridin-3-yl]-N-{{6-(trifluoromethyl)pyridin-3-yl}methyl}pyrrolidine-3-carboxamide (59).** Yellow solid, 72 mg. <sup>1</sup>H NMR (400 MHz, DMSO-*d*<sub>6</sub>)  $\delta$  ppm 8.92 (s, 1H), 8.77 (d, *J* = 26.0 Hz, 1H), 8.50 (s, 1H), 8.10 (s, 1H), 7.87 (d, *J* = 7.2 Hz, 1H), 7.73 (d, *J* = 8.0 Hz, 1H), 7.65 (d, *J* = 7.6 Hz, 1H), 4.51-4.34 (m, 1H), 4.25 (d, *J* = 12.4 Hz, 1H), 3.72 (s, 3H), 3.39 (d, *J* = 42.0 Hz, 3H). [ $\alpha$ ]D<sup>20</sup> +57.5 (*c* 0.26, MeOH). HRMS (ESI) *m/z*: [M + H]<sup>+</sup> Calcd for C<sub>18</sub>H<sub>17</sub>F<sub>6</sub>N<sub>4</sub>O 419.1306; found 419.1287.

**(+)-(3R,4S)-N-[(4-bromophenyl)methyl]-4-[6-(trifluoromethyl)pyridin-3-yl]pyrrolidine-3-carboxamide (60).** White solid, 120 mg. <sup>1</sup>H NMR (400 MHz, DMSO-*d*<sub>6</sub>)  $\delta$  ppm 8.67 (s, 1H), 8.46 (t, *J* = 5.6 Hz, 1H), 7.97 (d, *J* = 8.0 Hz, 1H), 7.84 (d, *J* = 8.0 Hz, 1H), 7.42 (d, *J* = 8.4 Hz, 2H), 7.02 (d, *J* = 8.0 Hz, 2H), 4.24 (dd, *J* = 15.2, 6.0 Hz, 1H), 4.12 (dd, *J* = 15.6, 5.6 Hz, 1H), 3.52 (t, *J* = 8.0 Hz, 1H), 3.32 (m, 2H), 2.96 (m, 2H), 2.84 (t, *J* = 9.2 Hz, 1H). [ $\alpha$ ]D<sup>20</sup> +91.4 (*c* 0.18, MeOH). HRMS (ESI) *m/z*: [M + H]<sup>+</sup> Calcd for C<sub>18</sub>H<sub>18</sub>BrF<sub>3</sub>N<sub>3</sub>O 428.0585; found 428.0574.

**(+)-(3R,4S)-N-({[1,1'-biphenyl]-4-yl}methyl)-4-[6-(trifluoromethyl)pyridin-3-yl]pyrrolidine-3-carboxamide (61).** White solid, 75 mg. <sup>1</sup>H NMR (400 MHz, DMSO-*d*<sub>6</sub>)  $\delta$  ppm 9.80 (s, br, 2H), 8.79 (s, 2H), 8.15 (d, *J* = 6.8 Hz, 1H), 7.94 (d, *J* = 8.0 Hz, 1H), 7.59 (d, *J* = 7.2 Hz, 2H), 7.48 (m, 4H), 7.35 (t, *J* = 7.6 Hz, 1H), 7.04 (d, *J* = 8.0 Hz, 2H), 4.39 (dd, *J* = 15.6, 5.6 Hz, 1H), 4.14 (dd, *J* = 15.2, 4.8 Hz, 1H), 3.74 (m, 3H), 3.30 (2H, overlapped with the peak of H<sub>2</sub>O), 2.90 (m, 2H). [ $\alpha$ ]D<sup>20</sup> +75.1 (*c* 0.29, MeOH). HRMS (ESI) *m/z*: [M + H]<sup>+</sup> Calcd for C<sub>24</sub>H<sub>23</sub>F<sub>3</sub>N<sub>3</sub>O 426.1793; found 426.1792.

**(±)-(3R,4S)-N-({4-[(dimethylamino)methyl]phenyl}methyl)-4-[6-(trifluoromethyl)pyridin-3-yl]pyrrolidine-3-carboxamide (62).** White solid, 132 mg. <sup>1</sup>H NMR (400 MHz, DMSO-*d*<sub>6</sub>)  $\delta$  ppm 8.66 (s, 1H), 8.38 (t, *J* = 6.0 Hz, 1H), 7.96 (d, *J* = 8.0 Hz, 1H), 7.82

(d,  $J = 8.0$  Hz, 1H), 7.13 (d,  $J = 7.6$  Hz, 2H), 7.00 (d,  $J = 8.0$  Hz, 2H), 4.27 (dd,  $J = 12.4, 6.4$  Hz, 1H), 4.11 (dd,  $J = 12.4, 5.6$  Hz, 1H), 3.30 (1H, overlapped with the peak of H<sub>2</sub>O), 2.90 (m, 2H), 2.81 (t,  $J = 5.6$  Hz, 1H), 2.09 (s, 6H). HRMS (ESI)  $m/z$ :  $[M + H]^+$  Calcd for C<sub>21</sub>H<sub>26</sub>F<sub>3</sub>N<sub>4</sub>O 407.2058; found 407.2052.



# <sup>1</sup>H NMR and <sup>13</sup>C NMR for 54b

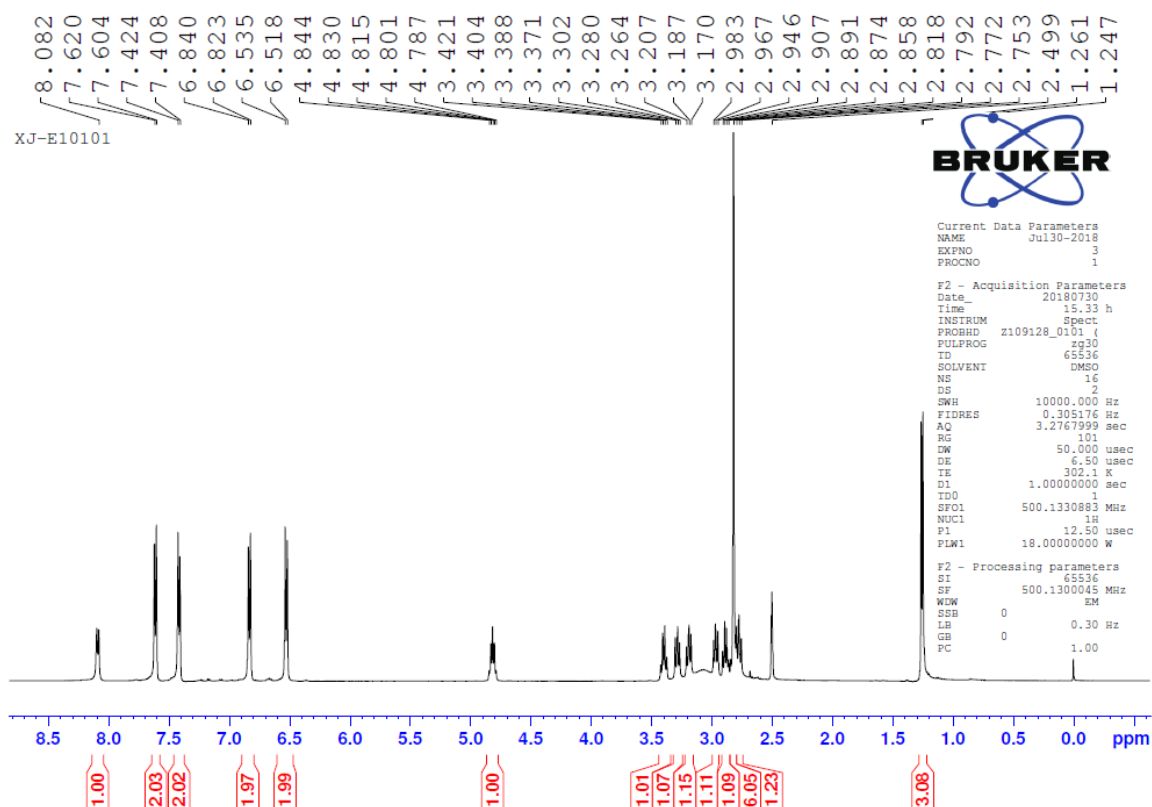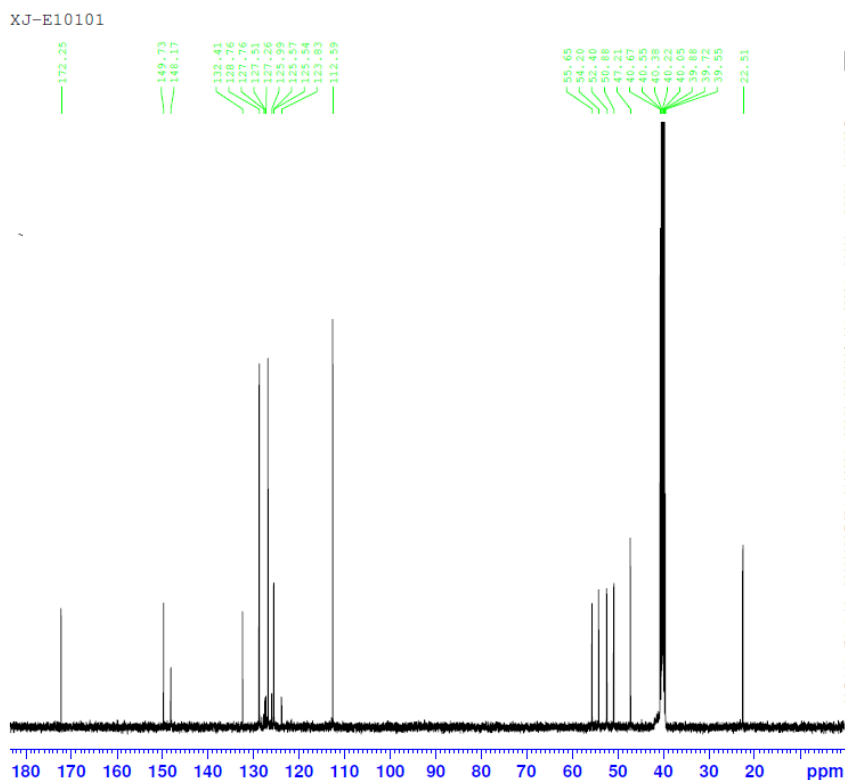

## X-ray crystallographic data for 54b

Bond precision: C-C = 0.0039 Å

Wavelength=1.54184

Cell: a=4.93147(7) b=21.1977(3) c=21.7467(3)  
alpha=90 beta=90 gamma=90

Temperature: 293 K

|                        | Calculated          | Reported            |
|------------------------|---------------------|---------------------|
| Volume                 | 2273.31(6)          | 2273.31(6)          |
| Space group            | P 2 21 21           | P 2 21 21           |
| Hall group             | P 2bc 2             | P 2bc 2             |
| Moiety formula         | C22 H27 F3 N3 O, Cl | C22 H27 F3 N3 O, Cl |
| Sum formula            | C22 H27 Cl F3 N3 O  | C22 H27 Cl F3 N3 O  |
| Mr                     | 441.92              | 441.92              |
| Dx, g cm <sup>-3</sup> | 1.291               | 1.291               |
| Z                      | 4                   | 4                   |
| Mu (mm <sup>-1</sup> ) | 1.857               | 1.857               |
| F000                   | 928.0               | 928.0               |
| F000'                  | 932.35              |                     |
| h, k, lmax             | 5, 25, 25           | 5, 24, 25           |
| Nref                   | 4028[ 2374 ]        | 3992                |
| Tmin, Tmax             | 0.895, 0.911        | 0.585, 1.000        |
| Tmin'                  | 0.395               |                     |

Correction method= # Reported T Limits: Tmin=0.585 Tmax=1.000

AbsCorr = MULTI-SCAN

Data completeness= 1.68/0.99

Theta(max)= 66.860

R(reflections)= 0.0412( 3805)

wR2(reflections)= 0.1260( 3992)

S = 1.072

Npar= 302

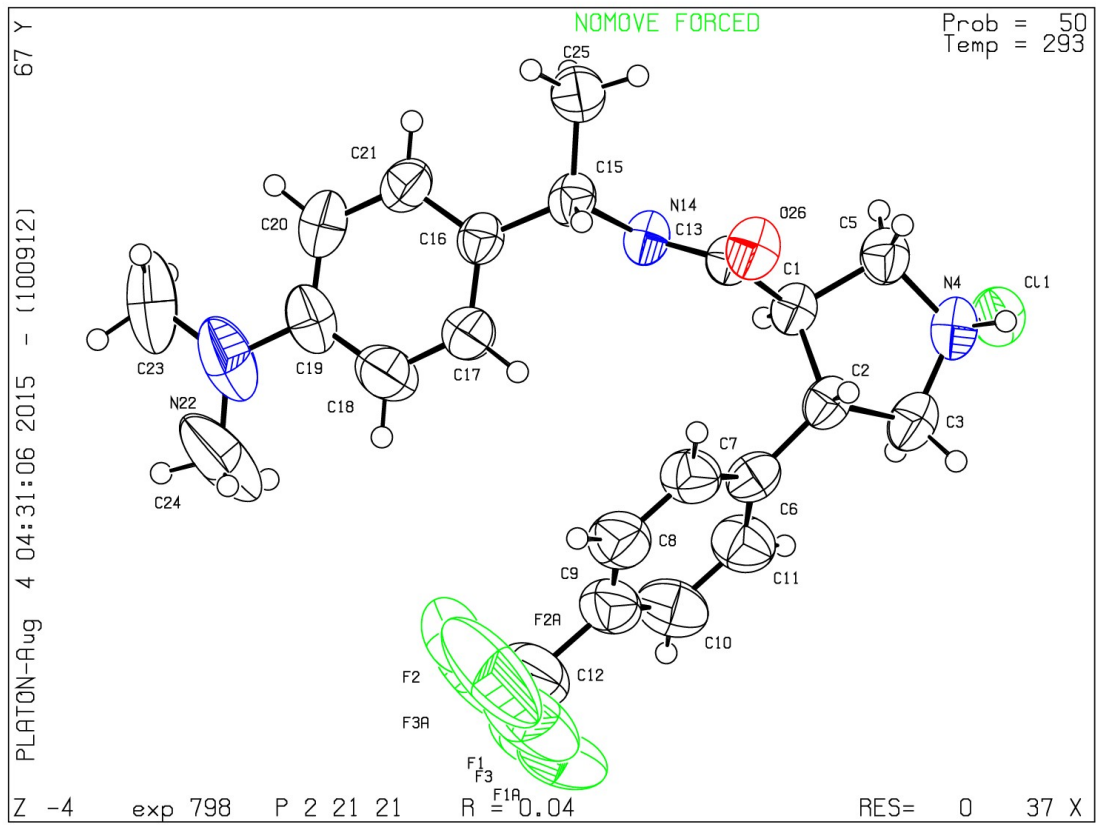

Supplement: NIHMS1047884-supplement-Supporting_Information.pdf [file NIHMS1047884-supplement-Supporting_Information.pdf]
